# Supplementary material for: Are Saudi Healthcare Workers (HCW) Willing to Receive the Monkeypox Virus Vaccine?
Source: Preprints.org preprint supplement (doi:10.20944/preprints202212.0562.v1), 2022-12-29
Supplement: Supplementary file 2 [file supplementary]

**Are Saudi Healthcare Workers (HCW) Willing to Receive the Monkeypox Virus Vaccine**

**"Survey of the study"**

***Section 1: Socio-demographic information of the survey respondents:***

- How old are you? ……years
- Gender:
- Male
- Female
- Marital status:
- Single
- Married
- Divorced/widowed
- Nationality:
- Saudi
- Non-Saudi
- Region of living in Saudi Arabia.
- Northern region
- Southern region
- Eastern region
- Western region
- Middle region
- What best characterizes the area where you live?
- Rural
- Urban
- Education level:
- Below diploma
- Diploma
- Bachelor's
- Master’s
- PhD or equivalent
- What is your current role?
- Physician (MD/DO)
- Nurse
- Allied health (e.g., MAs, tech, CNAs)
- Community health worker
- Pharmacist
- Other health worker
- Occupation sector:
- Government
- Private sector
- Which of the following best describes your current nature of work?
- Provide direct medical care to patients (e.g., physician, nurse, physician assistant, dentist, therapist, home healthcare provider or worker, or emergency responder.
- Do not provide direct medical care to patients, but work or volunteer in a healthcare facility (e.g., patient transport driver, administrator, janitor, food preparer, volunteer, or other in a hospital, doctor’s office, dentist’s office, clinic, nursing home, or residential care home)
- Nature of your routine work in hospital/health centre/clinic:
- Inpatient
- Outpatient
- Inpatient and outpatient
- Administrative
- Others
- How often your routine work have opportunity to deal with Monkeypox cases?
- Always
- Mainly
- Sometimes
- Rarely
- Never
- What is your healthcare facility level:
- Primary health Care
- Secondary health Care (Health Centre)
- Tertiary Care (Hospital)
- Years of working:
- <5 years,
- 5-10 years
- >10 years
- Monthly income:
- Less than 10000 SR,
- 10000-20000 SR,
- More than 20000 SR
- Do you have any of the following conditions? (Select all that apply.)
- Cancer
- Chronic kidney disease
- Chronic obstructive pulmonary disease (COPD)
- Heart conditions, such as heart failure, coronary artery disease, or Cardiomyopathies
- Obesity or severe obesity
- Sickle cell disease
- Type 2 diabetes mellitus
- Immunocompromised due to solid organ transplant
- Current smoker
- Have you got Influenzas' Vaccine before?
- Yes, in annual intervals
- Yes, in irregular intervals
- Never got before
- How concerned are you about getting Monkeypox?
- Not at all concerned
- A little concerned
- Moderately concerned
- Very concerned
- Do you personally know anyone in your family, group of friends, or community networks who became ill as a result of Monkeypox?
- Yes
- No
- Have you received a COVID-19 vaccine including booster doses?
- Yes
- No

***Section 2: Participants’ attitude towards the monkeypox vaccine***

- Do you think Monkeypox (MPX) vaccination will reduce the risk of Monkeypox virus (MPXV) infection and its complications?

- Yes

- No

- Do you think vaccination is necessary to control MPX infection?

- Yes

- No

- Are you worried about the possible side effects of MPX vaccines?

- Yes

- No

- Are you concerned about the effectiveness of MPX vaccines?

- Yes

- No

- Are you concerned about the safety of MPX vaccines?

- Yes

- No

- Are you worried about the defects of MPX vaccines?

- Yes

- No

- Are you willing to receive the MPX vaccine only with enough information available? - Yes

- No

- Do you think MPX vaccination should be made compulsory once it is available?

- Yes

- No

- Would you encourage your parents and friends to receive MPX vaccination?

- Yes

- No

- How comfortable do you feel addressing patient concerns about the monkeypox vaccine (e.g. concerns about side effects)?

- Very comfortable

- Somewhat comfortable

- Comfortable

- Somewhat uncomfortable

- Very uncomfortable

- Are you currently willing to receive the MPX vaccine if available?
- Yes, go to section 3
- No, go to section 4

***Section 3: Reasons for willingness to get the monkeypox vaccine***

- The reason for willingness to get monkeypox vaccine?
- It has protective effect against monkeypox (strongly agree, agree, neutral, disagree, strongly disagree)
- The benefits of vaccination outweigh the risk (strongly agree, agree, neutral, disagree, strongly disagree)
- The trust in vaccine effectiveness (strongly agree, agree, neutral, disagree, strongly disagree)
- The trust in vaccine safety (strongly agree, agree, neutral, disagree, strongly disagree)
- Vaccination is a social responsibility (strongly agree, agree, neutral, disagree, strongly disagree)
- The trust in the Saudi health ministry (MOH) decisions (strongly agree, agree, neutral, disagree, strongly disagree)

- What would motivate you to get vaccinated? (Select all that apply.)

- Protect my health Protect health of family/friends

- Protect my patients

- Protect health of co-workers

- Protect health of community

- Because others encouraged me to get vaccinated

- Other

- Not sure

***Section 4: Reasons for unwillingness to get the monkeypox vaccine***

- The reason for unwillingness to get the monkeypox vaccine?
- The fear of unknown adverse reactions (strongly agree, agree, neutral, disagree, strongly disagree)
- There is insufficient information on the vaccine (strongly agree, agree, neutral, disagree, strongly disagree)
- The doubt about the vaccine effectiveness (strongly agree, agree, neutral, disagree, strongly disagree)
- The doubts about the vaccine’s safety (strongly agree, agree, neutral, disagree, strongly disagree)
- Vaccines are not free (strongly agree, agree, neutral, disagree, strongly disagree)
- The experience of bad vaccination (strongly agree, agree, neutral, disagree, strongly disagree)
- I lost faith in the World Health Organisation (strongly agree, agree, neutral, disagree, strongly disagree)
- I lost faith in the Saudi Ministry of health (strongly agree, agree, neutral, disagree, strongly disagree)
- I lost faith in all vaccines
- I am not afraid of the monkeypox virus (strongly agree, agree, neutral, disagree, strongly disagree)

***Section 5: Infodemic Related question about monkeypox vaccine***

- How much do you trust the public health agencies that recommend you get a monkeypox vaccine? Would you say you trust them:
- Not at all
- A little
- Moderately
- Very Much
- Have you seen or heard any information about monkeypox vaccine (e.g., on the news, on social media, or from friends and family) that you could not determine were true or false?
- Yes
- No
- Not sure
- Select your top 3 most trusted sources of information about monkeypox vaccine:
- Saudi ministry of health (MOH)
- Centre for Disease Control and Prevention (CDC)
- Saudi Centre for Disease Control and Prevention (CDC)
- Employer Family and friends
- Saudi Food and Drug Administration (FDA)
- Health insurers
- News sources (e.g., television, internet, and radio)
- Nurses, Pharmacists, Primary care providers
- Religious leader(s)
- Online publishers of medical information (such as WebMD or Mayo Clinic)
- Social media (such as Facebook, Twitter, Instagram, WhatsApp, LinkedIn, or TikTok)
- Social media influencers
- Other
